# Supplementary material for: Novel polyazamacrocyclic receptor decorated core–shell superparamagnetic microspheres for selective binding and magnetic enrichment of palladium: synthesis, adsorptive behavior and coordination mechanism
Source: Royal Society of Chemistry journal article supplement (doi:10.1039/c6dt01024e), 2016-01-01
Supplement: c6dt01024e1.pdf [file c6dt01024e1.pdf]

Supporting Information for

# **Novel Polyazamacrocyclic Receptor Decorated Core-shell Superparamagnetic Microspheres for Selective Binding and Magnetic Enrichment of Palladium: Synthesis, Adsorptive Behavior and Coordination Mechanism**

Fengcheng Wu<sup>a</sup>, Gang Ye<sup>a,b,\*</sup>, Rong Yi<sup>a</sup>, Taoxiang Sun<sup>a</sup>, Chao Xu<sup>a,b</sup> and Jing Chen<sup>a,b,\*</sup>

<sup>a</sup> Collaborative Innovation Center of Advanced Nuclear Energy Technology, Institute of Nuclear and New Energy  
Technology, Tsinghua University, Beijing 100084, China.

<sup>b</sup> Beijing Key Lab of Radioactive Waste Treatment, Tsinghua University, Beijing 100084, China \*Corresponding  
author, e-mail: yegang@mail.tsinghua.edu.cn; jingxia@tsinghua.edu.cn.

## **Contents**

|                                                                                                                                                                                                                           |      |
|---------------------------------------------------------------------------------------------------------------------------------------------------------------------------------------------------------------------------|------|
| Experimental                                                                                                                                                                                                              | S-2  |
| Figure S1 Zeta-potential curve of Fe <sub>3</sub> O <sub>4</sub> @SiO <sub>2</sub> @DOTA as a function of pH                                                                                                              | S-3  |
| Figure S2 C 1s high resolution spectra of APTES-modified Fe <sub>3</sub> O <sub>4</sub> @SiO <sub>2</sub>                                                                                                                 | S-4  |
| Figure S3 FT-IR spectra of DOTA compound, Fe <sub>3</sub> O <sub>4</sub> @SiO <sub>2</sub> @DOTA and Fe <sub>3</sub> O <sub>4</sub> @SiO <sub>2</sub> @DOTA-Pd                                                            | S-5  |
| Table S1 Pore structure parameters and specific surface area of Fe <sub>3</sub> O <sub>4</sub> @SiO <sub>2</sub>                                                                                                          | S-6  |
| Table S2 Comparison of Pd(II) adsorption ability of Fe <sub>3</sub> O <sub>4</sub> @SiO <sub>2</sub> @DOTA with other sorbents                                                                                            | S-7  |
| Table S3 Elution of Pd(II) loaded on the Fe <sub>3</sub> O <sub>4</sub> @SiO <sub>2</sub> @DOTA by different eluents                                                                                                      | S-8  |
| Table S4 Composition of APTES-modified Fe <sub>3</sub> O <sub>4</sub> @SiO <sub>2</sub> , Fe <sub>3</sub> O <sub>4</sub> @SiO <sub>2</sub> @DOTA, and Fe <sub>3</sub> O <sub>4</sub> @SiO <sub>2</sub> @DOTA-Pd<br>by XPS | S-9  |
| References                                                                                                                                                                                                                | S-10 |

## Experimental

### Sample preparation for XPS survey and FT-IR Spectrophotometry

30 mg  $\text{Fe}_3\text{O}_4@\text{SiO}_2@\text{DOTA}$  microspheres were dispersed in 1.0 mol/L  $\text{HNO}_3$  solution containing 1.0 g/L Pd(II) in a 25 °C constant temperature oscillator. After shaking for 24 h to reach the equilibrium, the resulting  $\text{Fe}_3\text{O}_4@\text{SiO}_2@\text{DOTA-Pd}$  microspheres were separated and rinsed with water and ethanol, respectively, followed by drying at 45 °C under vacuum for 12 h.

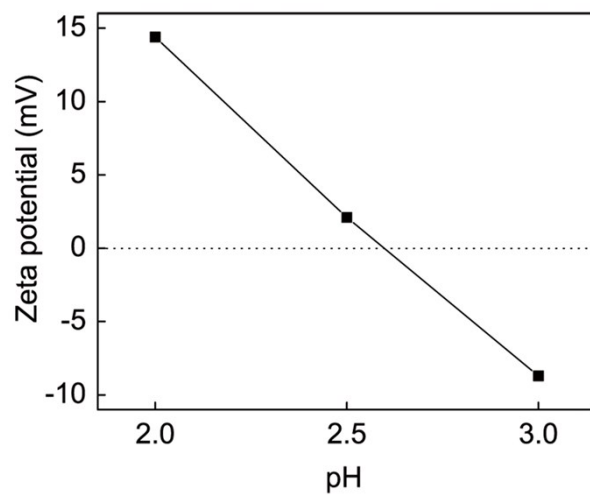

**Figure S1.** Zeta-potential curve of  $\text{Fe}_3\text{O}_4@\text{SiO}_2@\text{DOTA}$  as a function of pH

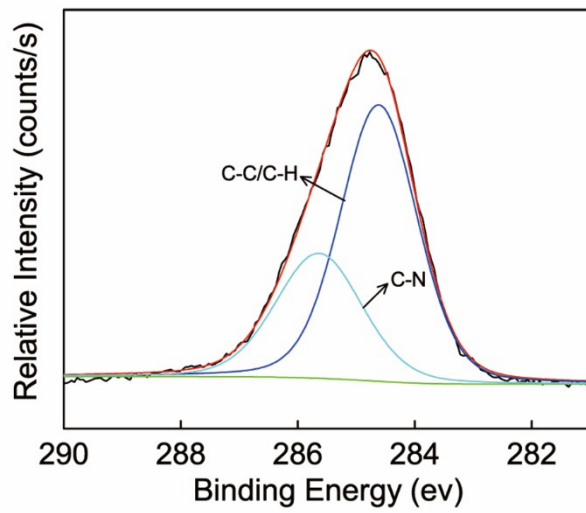

**Figure S2.** C 1s high resolution spectra of APTES-modified Fe<sub>3</sub>O<sub>4</sub>@SiO<sub>2</sub>

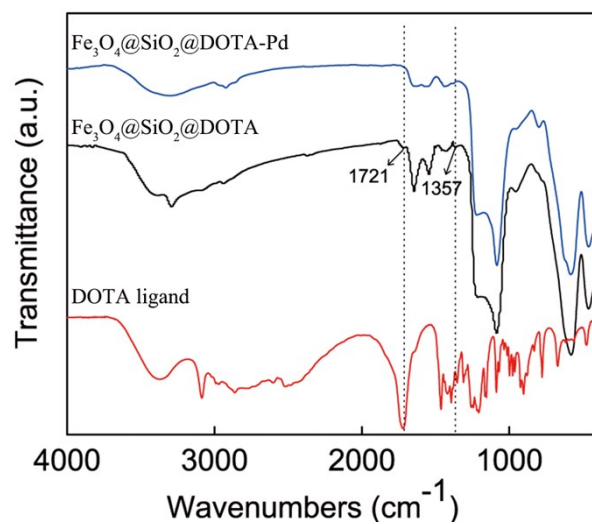

**Figure S3.** FT-IR spectra of DOTA ligand,  $\text{Fe}_3\text{O}_4@\text{SiO}_2@\text{DOTA}$  and  $\text{Fe}_3\text{O}_4@\text{SiO}_2@\text{DOTA-Pd}$

**Table S1** Pore structure parameters and specific surface area of Fe<sub>3</sub>O<sub>4</sub>@SiO<sub>2</sub> microspheres

| Sample                                           | BET surface area<br>(m <sup>2</sup> /g) | Pore volume<br>(cm <sup>3</sup> /g) | Pore size<br>(nm) |
|--------------------------------------------------|-----------------------------------------|-------------------------------------|-------------------|
| Fe <sub>3</sub> O <sub>4</sub> @SiO <sub>2</sub> | 34.8                                    | 0.039                               | 2.5               |

**Table S2.** Comparison of Pd(II) adsorption ability of Fe<sub>3</sub>O<sub>4</sub>@SiO<sub>2</sub>@DOTA with other sorbents

| Sorbents                                               | Experimental conditions              | $q_{\max}$ ( $\mu\text{mol/g}$ ) | Ref.      |
|--------------------------------------------------------|--------------------------------------|----------------------------------|-----------|
| Gallic acid resin                                      | T=293 K, 0.01 mol/L HNO <sub>3</sub> | 81.9                             | 1         |
| Anthracite LKAU-4                                      | T=298 K, pH=1.5 HCl                  | 9.3                              | 2         |
| Sulfur-impregnated CMK-3/S                             | T=298 K, 1.0 mol/L HCl               | 900.0                            | 3         |
| Crown ether decorated silica particles                 | T=298 K, 1.0 mol/L HNO <sub>3</sub>  | 771.3                            | 4         |
| Calixcrown ether decorated silica particles            | T=298 K, 1.0 mol/L HNO <sub>3</sub>  | 1510.1                           | 5         |
| Fe <sub>3</sub> O <sub>4</sub> @SiO <sub>2</sub> @DOTA | T=298 K, 1.0 mol/L HNO <sub>3</sub>  | 105.3                            | This work |

**Table S3.** Elution of Pd(II) loaded on the Fe<sub>3</sub>O<sub>4</sub>@SiO<sub>2</sub>@DOTA by different eluents

| Eluents                                  | Recovery rate of Pd (II) (%) <sup>a,b</sup> |
|------------------------------------------|---------------------------------------------|
| H <sub>2</sub> O                         | 0.5 ± 0.3                                   |
| Acetic acid                              | 1.2 ± 0.6                                   |
| 0.1 mol/L HCl                            | 2.3 ± 0.5                                   |
| Oxalic acid                              | 4.6 ± 0.3                                   |
| 1 mol/L HNO <sub>3</sub>                 | 5.1 ± 0.6                                   |
| 3 mol/L HNO <sub>3</sub>                 | 6.4 ± 0.8                                   |
| 5% thiourea                              | 83.2 ± 0.6                                  |
| 1% thiourea + 0.5 mol/L HNO <sub>3</sub> | 93.2 ± 0.9                                  |

<sup>a</sup> Adsorption condition: [Pd]= 50 mg/L, [HNO<sub>3</sub>]= 1.0 mol/L, m/v=0.01 g/mL, contact time=15 h, T=298 K

<sup>b</sup> Elution condition: m/v= 0.01 g/mL, contact time=15 h, T=298 K



**Table S4.** Composition of APTES-modified Fe<sub>3</sub>O<sub>4</sub>@SiO<sub>2</sub>, Fe<sub>3</sub>O<sub>4</sub>@SiO<sub>2</sub>@DOTA, and Fe<sub>3</sub>O<sub>4</sub>@SiO<sub>2</sub>@DOTA-Pd by XPS

| Samples                                                         | XPS analysis ( <i>wt. %</i> ) |       |       |      |
|-----------------------------------------------------------------|-------------------------------|-------|-------|------|
|                                                                 | C                             | N     | O     | Pd   |
| APTES-modified Fe <sub>3</sub> O <sub>4</sub> @SiO <sub>2</sub> | 35.39                         | 9.05  | 55.36 | Null |
| Fe <sub>3</sub> O <sub>4</sub> @SiO <sub>2</sub> @DOTA          | 41.15                         | 14.04 | 44.81 | Null |
| Fe <sub>3</sub> O <sub>4</sub> @SiO <sub>2</sub> @DOTA-Pd       | 43.15                         | 12.38 | 43.09 | 1.38 |

## References

1. M. Can, E. Bulut, and M. Ozacar, *Ind. Eng. Chem. Res.*, 2012, **51**, 6052-6053.
2. O. N. Kononova, N. G. Goryaeva, N. B. Dostovalova, S. V. Kachin, and A. G. Kholmogorov, *Solid. Fuel. Chem.*, 2007, **41**, 252-255.
3. P.R. Zalupski, R. McDowell, and G. Dutech, *Solvent. Extr. Ion. Exc.*, 2014, **32**, 737-748.
4. F. F. Bai, G. Ye, G. J. Chen, J. C. Wei, J. C. Wang and J. Chen, *Sep. Purif. Technol.*, 2013, **106**, 38-46.
5. Y. X. Leng, J. Xu, J. C. Wei and G. Ye, *Chem. Eng. J.*, 2013, **232**, 319-326.
